1  
2  
3  
4  
5  
6  
7  
8  
9  
10  
11  
12  
13  
14  
15  
16  
17  
18  
19  
20  
21  
22  
23  
24  
25  
26  
27  
28  
29

## Function and Importance of Marine Bacterial Transporters of Plankton Exometabolites

William F. Schroer<sup>1</sup>, Hannah E. Kepner<sup>1,2</sup>, Mario Uchimiya<sup>3</sup>, Catalina Mejia<sup>4</sup>, Lidimarie Trujillo Rodriguez<sup>4</sup>,  
Christopher R. Reisch<sup>4</sup>, and Mary Ann Moran<sup>1</sup>

<sup>1</sup>Dept. of Marine Sciences, University of Georgia, Athens, GA 30602 USA

<sup>2</sup>College of Fisheries and Ocean Sciences, University of Alaska Fairbanks, Fairbanks, AK 99775 USA

<sup>3</sup>Complex Carbohydrate Research Center, University of Georgia, Athens, GA 30602 USA

<sup>4</sup>Dept. of Microbiology and Cell Science, University of Florida, Gainesville, FL 32611 USA

### Corresponding Author:

Mary Ann Moran  
Department of Marine Sciences  
University of Georgia  
Athens, GA 30602  
mmoran@uga.edu  
706-542-6481

### Running Title:

Bacterial Transporters of Marine Exometabolites

### Competing Interest Statement:

The authors declare no competing interests.

30 **Abstract**

31 Metabolite exchange within marine microbial communities transfers carbon and other major elements  
32 through global cycles and forms the basis of microbial interactions. Yet lack of gene annotations and  
33 concern about the quality of existing ones remain major impediments to revealing the metabolite-  
34 microbial network. We employed an arrayed mutant library of the marine bacterium *Ruegeria pomeroyi*  
35 DSS-3 to experimentally annotate substrates of organic compound transporter systems, using mutant  
36 growth and compound drawdown analyses to link transporters to their substrates. Mutant experiments  
37 verified substrates for thirteen *R. pomeroyi* transporters. Four were previously hypothesized based on  
38 gene expression data (taurine, glucose/xylose, isethionate, and cadaverine/putrescine/spermidine); five  
39 were previously hypothesized based on homology to experimentally annotated transporters in other  
40 bacteria (citrate, glycerol, *N*-acetylglucosamine, fumarate/malate/succinate, and  
41 dimethylsulfoniopropionate); and four had no previous annotations (thymidine, carnitine, cysteate, and  
42 3-hydroxybutyrate transporter). These bring the total number of experimentally-verified organic carbon  
43 influx transporters to 17 of 126 in the *R. pomeroyi* genome. In a longitudinal study of a coastal  
44 phytoplankton bloom, expression patterns of the experimentally annotated transporters linked them to  
45 different stages of the bloom, and also led to the hypothesis that citrate and 3-hydroxybutyrate were  
46 among the most highly available bacterial substrates. Improved functional knowledge of these  
47 gatekeepers of organic carbon uptake is facilitating better characterization of the surface ocean  
48 metabolite network.

## 49 **Introduction**

50 The ocean microbiome plays a central role in mediating carbon and element cycles through its unique  
51 ability to process organic carbon dissolved in seawater (1-3). Ultimately, marine bacteria take up and  
52 assimilate as much as half of marine net primary production (NPP) in the form of exometabolites  
53 derived from excretion and death of phytoplankton and other microbes (3, 4). Given that current and  
54 future controls over this globally important carbon flux are poorly understood, identification of the  
55 metabolites produced and consumed by ocean microbes is critically needed (5).

56 One approach to unraveling marine metabolite flux is through the application of transcriptomic and  
57 proteomic tools by which dynamics of the chemical environment can be gleaned from changes in the  
58 expression of microbial genes. Such approaches are easy to scale with advancements in sequencing and  
59 data sharing (6, 7) and have successfully addressed metabolite dynamics in various microbial systems  
60 such as model communities (8), phytoplankton blooms (9, 10), oligotrophic ocean regions (11, 12), and  
61 global-scale ocean surveys (13-15). Transporter genes in particular are of value in such approaches  
62 because they are a cell's interface with its environment and their expression can reveal the identity of  
63 available metabolites (16). A key limitation to their use, however is a dependence on accurate gene  
64 annotation to identify protein function. For most microbial transporters, the substrate is still unknown.  
65 Others are annotated computationally based on homology (17-19), yet this is error prone when  
66 relationships to experimentally annotated genes is distant (20). Indeed, transporters have a lower rate  
67 of successful annotation based on homology than catabolic enzymes (19).

68 Experimental confirmation of gene annotation is the gold standard, but is both time and resource  
69 intensive. Moreover, it is largely limited to cultured species for which genetic systems are available,  
70 leaving out much of the diversity represented in environmental bacteria. An alternate approach uses  
71 pooled transposon mutants whose fitness under defined selection pressure provides a hypothesis of

72 gene function (21-24). This method requires only a minimal genetic system to introduce small DNA  
73 fragments (transposons) and a protein that catalyzes genomic insertion (transposase) into bacterial  
74 cells. A recent high-throughput advancement of this method, termed BarSeq (25, 26), uses unique  
75 barcodes that link each transposon insertion site to the specific gene it disrupts, thereby allowing  
76 mutant pools to be analyzed for fitness through cost-effective amplicon sequencing. A wide taxonomic  
77 range of bacteria have been shown to be amenable to BarSeq library construction, resulting in  
78 hypothesis generation for gene functions that include stress response, metabolism, phage resistance,  
79 and transport (25, 27-29). Hypotheses can be confirmed experimentally if targeted single-gene mutants  
80 are subsequently constructed, as for those predicting membrane proteins (28) and catabolic enzymes  
81 (30).

82 For a small number of well-studied model bacterial species, genome-wide arrayed mutant libraries have  
83 been constructed through painstaking targeted gene deletions to produce libraries of single-gene  
84 knockouts across the genome. Excellent tools for gene annotation, these arrayed libraries are currently  
85 available for well-established model bacteria, such as *Escherichia coli* (31), *Acinetobacter baylyi* (32),  
86 *Bacillus subtilis* (33, 34), and *Salmonella enterica* (35). Pooled transposon mutant libraries have been  
87 used successfully as the starting material for such arrayed libraries (24, 36, 37), but require individual  
88 sequencing of tens of thousands of colonies to determine transposon insertion location.

89 Recently, a modification of the BarSeq approach was used to create an inexpensive arrayed mutant  
90 library of the marine model bacterium *Ruegeria pomeroyi* DSS-3 (38). The method took advantage of the  
91 ease of insertion site identification in BarSeq libraries in combination with 384-well plate location  
92 barcodes to generate an arrayed library of single-gene knockout mutants for *R. pomeroyi*, similar to the  
93 approach used recently for the anaerobic gut microbe *Bacteroides thetaiotaomicron* (39). *R. pomeroyi* is  
94 known for its ecological association with marine phytoplankton and ability to grow on plankton-derived  
95 metabolites (16, 40, 41), but to this point substrates of only four of the 126 putative organic compound

96 influx transporters have been experimentally verified via gene knockout mutants: choline (42),  
97 dihydroxypropanesulfonate (DHPS) (41, 43), ectoine (44), and trimethylamine N-oxide (13). Here we  
98 leverage a set of 156 influx transporter mutants from the arrayed *R. pomeroyi* BarSeq (arrayed-BarSeq)  
99 library in high-throughput screens against 63 possible substrates to increase knowledge of transporter  
100 function. Resulting gene annotations were then applied to a set of *R. pomeroyi* transcriptomes sampled  
101 after introduction to a bloom Monterey Bay, CA, USA (Nowinski and Moran, 2021). The 13 newly verified  
102 transporter annotations provided insights into the metabolites serving roles as substrates to  
103 heterotrophic bacteria during a coastal bloom.

## 104 **Methods**

### 105 *BarSeq library generation and mapping*

106 Full methods for generating and arraying the *R. pomeroyi* BarSeq mutant library are provided in Mejia *et*  
107 *al.* (38). Briefly, a pool of randomly barcoded transposon mutants was constructed according to  
108 Wetmore *et al.* (26) by conjugating *R. pomeroyi* DSS-3 with *E. coli* WM3064 containing the transposome  
109 pKMW7 Tn5 library (strain APA766). The insertion sites were subsequently linked to the unique  
110 barcodes by sequencing through the barcoded transposons into the disrupted genes.

111 To construct the arrayed libraries, individual mutants were isolated on ½ YTSS solid medium amended  
112 with 100 µg ml<sup>-1</sup> kanamycin. Colonies were picked after 2 d (Qpix2 automated colony picker; Molecular  
113 Devices, San Jose, CA) and arrayed into 384 well plates containing 80 µl of liquid ½ YTSS + kanamycin  
114 medium. Plates were incubated at 30°C for 2-5 d until visible growth appeared and then replicated.  
115 Glycerol was added to a final concentration of 20% and plates were frozen at -80°C. To identify the  
116 mutant situated in each well, a set of 16 forward and 24 reverse location primers were synthesized with  
117 unique 8 bp barcodes. These were used combinatorially in 384 unique pairs for PCR amplification of the  
118 20 bp BarSeq barcodes linked to the 8 bp location primers, mapping mutants to their well location. In

119 total 27,488 unique mutants were arrayed in 384-well plates, covering 3,292 protein encoding genes.

120 Mutants for 156 putative organic compound influx transporter genes were re-arrayed into two 96 well  
121 plates for subsequent screening (Table S1).

### 122 *Growth Screen*

123 Mutant cultures were pre-grown overnight in ½ YTSS medium with 50 µg ml<sup>-1</sup> kanamycin. Screens were  
124 performed in L1 minimal medium (45) modified to a salinity of 20 and amended with ammonium (3 mM)  
125 and kanamycin (50 µg ml<sup>-1</sup>). For the initial screen, overnight cultures of individual mutants (2 µl) were  
126 inoculated into 198 µl of modified L1 with a single substrate as the sole carbon source at 8 mM carbon.  
127 Plates were incubated at 25°C with shaking, and optical density (OD<sub>600</sub>) was read at intervals of 6-12 h  
128 until cultures entered stationary phase at ~24-48 h. Mutants exhibiting phenotypes in the initial screen  
129 were moved to the targeted screen in which 4 replicate 200 µl mutant cultures were prepared by  
130 inoculating 2 µl of washed (3x) overnight culture into 96 well plates containing 198 µl modified L1  
131 medium and a substrate at 8 mM carbon. As a positive control, four wells with the same medium were  
132 inoculated with washed overnight cultures of the pooled-BarSeq library, used as a proxy for wild-type *R.*  
133 *pomeroyi* growth but harboring a transposon/kanamycin resistance gene insertion. Cultures were grown  
134 at 25°C in a Synergy H1 plate reader (BioTek, Winooski, VT, USA) shaking at 425 rpm for 68-72 h. OD<sub>600</sub>  
135 readings were corrected to a pathlength of 1 cm assuming a volume of 200 µl.

136 Mutant defect was identified by comparison to the OD<sub>600</sub> achieved by the pooled-BarSeq library (n=4;  
137 ANOVA and TukeyHSD; p ≤ 0.05) (Table 1). Mutants with significantly lower OD<sub>600</sub> on multiple substrates  
138 were regrown on rich medium to check for viability, and removed from further consideration if they  
139 broadly demonstrated poor growth; two mutants were removed after this viability check (SPO0050 and  
140 SPO2952).

141

142 *Metabolite drawdown screen*

143 For each mutant-substrate pair identified from the growth screens, 3 replicate 220  $\mu$ l cultures were  
144 prepared in 96 well plates by inoculating 3  $\mu$ l of washed (3x) overnight mutant cultures into minimal  
145 medium containing the candidate substrate at 8 mM carbon. Cultures were grown shaking at 25°C for 24  
146 h or 36 h, depending on the growth rate supported by the carbon source. At termination, 200  $\mu$ l of  
147 medium were collected and centrifuged at 3,700 rpm for 10 min, and the supernatant was stored at -  
148 80°C. Metabolite analysis was performed using a Bruker Avance III 600 MHz spectrometer (Bruker,  
149 Billerica, MA, USA) equipped with a 5-mm TCI cryoprobe. Samples were prepared with addition of a  
150 deuterated phosphate buffer (30 mmol L<sup>-1</sup>, pH 7.4) and the internal standard 2,2-dimethyl-2-  
151 silapentane-5-sulfonate-d<sub>6</sub> (DSS, 1 mmol L<sup>-1</sup>) (10:1 (vol : vol)) and transferred to 3 mm NMR tubes  
152 (Bruker). Data were acquired by a one dimensional <sup>1</sup>H experiment with water suppression (noesypr1d,  
153 Bruker) at 298K using TopSpin 3.6.4 (Bruker). For glycerol, a <sup>1</sup>H J-resolved experiment (jresgpprqf) was  
154 used to avoid overlapping background peaks. Spectra were processed using NMRPipe on NMRbox (46,  
155 47), and the processed data were analyzed using Metabolomics Toolbox  
156 ([https://github.com/artedison/Edison\\_Lab\\_Shared\\_Metabolomics\\_UGA](https://github.com/artedison/Edison_Lab_Shared_Metabolomics_UGA)) and MATLAB R2022a  
157 (MathWorks). For quantification of metabolites, spectra were normalized to DSS and peak area for  
158 representative peaks was calculated. TopSpin experiment settings, NMRpipe spectra processing  
159 parameters, and MATLAB data analysis scripts are available in Metabolomics Workbench (see Data  
160 Availability).

161 *Pooled-BarSeq experiment*

162 Minimal medium was prepared for 23 substrates (Fig. 3) at 8 mM carbon in a 96 well plate (n=4). Each  
163 well was inoculated with 20  $\mu$ l of washed (3x) overnight culture of the *R. pomeroiyi* pooled-BarSeq  
164 library. After growth with shaking at 25°C for 72 h, cultures were serially transferred into fresh media

165 four additional times and then transferred to 1.5 ml tubes, pelleted by centrifugation at 8,000 x g for 3  
166 min, and stored at -80°C until further processing. Genomic DNA was extracted from the cell pellets using  
167 the DNEasy blood and tissue kit (Qiagen, Hilden, Germany). PCR amplification of BarSeq barcodes was  
168 performed using primers modified from Wetmore *et al.* (26) with PhusionHF master mix (Fisher,  
169 Pittsburg, PA). An aliquot of 8 ng of product from each sample was pooled, purified using HiPrep beads  
170 (MagBio, Gaithersburg, MD, USA), and sequenced on a NextSeq SE150 Mid Output flow cell (SE150) at  
171 the Georgia Genomics and Bioinformatics Core Facility (Athens, Georgia, USA). Sequence data were  
172 processed according to Wetmore *et al.* (26). Following quality control, an average of 35,090 unique  
173 barcodes mapped to insertions that fell within the interior 10 to 90% of *R. pomeroyi* coding sequences.  
174 In total, 55 million reads were mapped to insertions in 3,570 genes (out of 4,469 protein-encoding genes  
175 in the *R. pomeroyi* genome) with a median of 404,513 mapped reads per sample. Reads mapping to  
176 different insertion sites within the same coding sequence were pooled for subsequent analyses. Mutant  
177 enrichment or depletion relative to initial abundance was used as a proxy for fitness, calculated as the  
178 mean fold-difference between abundance in a given treatment compared to abundance in all other  
179 treatments.

#### 180 *Transporter expression during a Monterey Bay bloom*

181 Processed *R. pomeroyi* transcriptome data (transcripts per million and Z-scores), metadata, and  
182 complete experimental methods are available elsewhere (9). Briefly, on 14 days over 5 weeks, *R.*  
183 *pomeroyi* cells were added to 350 ml of unfiltered surface water (n=3). *R. pomeroyi* was inoculated at  
184 cell numbers equivalent to that of natural heterotrophic bacteria. Subsequent sequencing analysis  
185 indicated that *R. pomeroyi* transcripts averaged 38% of the bacterial reads in the metatranscriptome  
186 datasets (48). Cells were collected by filtration after 90 min and processed for RNAseq analysis.

187



## 188 *Homologs in the Roseobacter group*

189 Roseobacter strains with complete genomes available through RefSeq were selected based on Simon *et*  
190 *al.* (49). Phylogenic analysis of the 14 selected strains was carried with a set of 117 single copy genes  
191 using GToTree v1.6.37 (50). *R. pomeroyi* transporter genes with homologs in the other strains were  
192 identified by BLASTp using Diamond v2.0.14.152 (51), threshold:  $E \leq 10^{-5}$  and identity  $\geq 70\%$ . Data  
193 analysis and figure generation was performed using R v3.6.1. Manual checks of gene neighborhoods  
194 were performed when BLASTp results showed that multicomponent transporters were missing one or  
195 more component gene.

## 196 **Results and Discussion**

197 From a pooled-BarSeq transposon mutant library of *R. pomeroyi* prepared according to Wetmore *et al.*  
198 (26), 48,000 colonies were individually arrayed into 384 well plates (Fig. 1). The gene disrupted in each  
199 arrayed mutant was determined by sequencing the transposon barcode in conjunction with indexed  
200 primers that indicated plate column and row (38), creating a library that covers 3,292 of the 4,469  
201 protein-encoded genes in the *R. pomeroyi* genome (73%). From the genome annotations (52, 53) we  
202 identified 156 mutants that were predicted to encode for 104 organic compound influx transporter  
203 proteins (Table S1). These were re-arrayed into multi-well plates to facilitate functional screens on 63  
204 compounds known to be produced by marine phytoplankton (54).

## 205 *Growth Screens*

206 Initial screens of the 156 mutants identified candidate substrates of transporter genes based on OD<sub>600</sub>  
207 deficits after 24-72 h) ( $n \sim 2$ ). These mutants were transferred to a second round of screening in which  
208 each candidate substrate/mutant pair was monitored for growth with hourly OD readings and higher  
209 replication ( $n=4$ ). A positive control treatment consisting of the full pooled-BarSeq library approximated  
210 wild-type growth (Fig. 2A, Fig. S1). We used mutants of three previously confirmed transporters as

211 positive controls for the screening protocols; these were the *tctABC* for choline uptake (42), *hpsKLM* for  
212 DHPS uptake (41, 43), and *uehABC* for ectoine (44) (Table 1) (Fig. S1). Mutants that exhibited growth  
213 deficits on more than one metabolite were not considered further unless the metabolites had high  
214 structural similarity.

215 The growth-based screening process resulted in substrate predictions for 13 *R. pomeroyi* transporters  
216 (Fig. 2A, Fig. S1, Table 1). Four of these were consistent with target metabolites hypothesized based on  
217 previous gene expression data: *xy/FGH* (glucose/xylose) (55), *iseKLM* (isethionate) (56), *potFGHI*  
218 (polyamines: cadaverine, spermidine, and/or putrescine)(57), and *tauABC* (taurine) (58). Four were  
219 consistent with target metabolites hypothesized based on *in silico* analysis by the GapMind tool for  
220 carbon sources (19): *tctABC* (citrate), *dctMPQ* (the C4 organic acids succinate, fumarate, and malate),  
221 *nagTUVW* (N-acetylglucosamine), and *glpVSTPQ* (glycerol). One was consistent with a target metabolite  
222 based on homology to an experimentally verified transporter in the closely related species *Roseovarius*  
223 *nubinhibens* (59): *dmdT* (dimethylsulfoniopropionate (DMSP) (Table 1). Four were novel annotations  
224 with no previous substrate predictions: *cntTUVWX* (carnitine), *cuyTUVW* (cysteate), *hbtABC* (3-  
225 hydroxybutyrate), and *nupABC* (thymidine) (Table 1). All hypothesized substrates were identified in  
226 previous studies as endometabolites in cultured phytoplankton or natural plankton communities (40,  
227 60), or as exometabolites in phytoplankton cultures or seawater (61, 62).

#### 228 *Metabolite Drawdown Screens*

229 Substrate identifications emerging from the growth screens were further tested in metabolite  
230 drawdown experiments. Similar to the design of the growth screens, isolated mutants were inoculated  
231 into minimal medium with a single substrate as the sole carbon source (n=3), alongside positive control  
232 treatments inoculated with the pooled-BarSeq library as an analog for wild type. Spent media samples  
233 were collected at 24 h or, for substrates that supported slower growth, at 36-48 h (Fig. 2B, Fig S2).

234 Substrate concentration was measured by  $^1\text{H-NMR}$  and a mutant drawdown defect was defined as  
235 significantly higher substrate concentration in the mutant cultures compared to the pooled-BarSeq  
236 library (ANOVA and TukeyHSD,  $p \leq 0.05$ , Table 1). All transporter annotations that had emerged from the  
237 growth screens were subsequently upheld in these draw-down screens (Fig. 2B, Fig S2), consistent with  
238 gene disruption reducing or eliminating substrate uptake (Fig. 2A, Fig S1).

239 Some transporter mutants, such as *betT*, were completely unable to grow on or draw down the  
240 substrate (Figs. S1, S2). This is the expected pattern if the disrupted transporter is the only system for  
241 uptake by *R. pomeroyi*. Alternatively, some of the transporter mutants, such as *dmdT*, were capable of  
242 partial growth and draw-down, but significantly less than the mutant pool (Figs. 2, S1, S2). This pattern  
243 suggests that more than one transporter in the *R. pomeroyi* genome can take up the compound. For  
244 example, *dmdT* belongs to the BCCT-type family whose members frequently have low substrate affinity  
245 (63), suggesting that a second, high-affinity transporter may be used when substrates become depleted;  
246 previous studies have similarly suggested that *R. pomeroyi* may have more than one DMSP transporter  
247 (59, 64). In a mixed result, complete loss of growth and draw-down for fumarate yet partial losses for  
248 succinate and malate suggests that *dctMPQ* is the only transporter system in the *R. pomeroyi* genome  
249 for fumarate, but the other C4 organic acids likely have a second transporter (Fig. 2B, Fig S2, Table 1).

#### 250 *Comparison to Pooled-BarSeq Libraries*

251 Another approach to identify substrates of bacterial transporters is to place a pooled-BarSeq library  
252 under selection on a single carbon source (25). In this case, transporter mutants that exhibit poor  
253 growth are identified as candidate uptake systems. We asked whether the pooled-BarSeq approach  
254 would have been sufficient to recognize the *R. pomeroyi* transporters identified here, saving the effort  
255 of arraying the BarSeq library while also providing additional information on catabolic and regulatory  
256 genes that may support metabolite utilization.

257 Mutant abundance was calculated for members of the pooled-BarSeq library following selection for  
258 growth on ten substrates used in the growth screens (Fig. 3). Selection occurred over four growth  
259 dilution cycles of 72 h each. Amplicon sequencing of the pooled library at the beginning and end of  
260 selection (26) was used to calculate relative growth rates for each mutant in the pool as a proxy for  
261 fitness. For five substrates, the pooled BarSeq results agreed with results from the arrayed mutant  
262 screens, identifying the same transporter systems for DHPS, ectoine, glucose, 3-hydroxybutyrate, and  
263 spermidine (n=4; T test,  $p \leq 0.05$ ) (Fig. 3). For five other substrates, the known transporter mutant was  
264 either not significantly depleted from the mutant pool or significantly enriched, and thus transporters  
265 were not correctly identified for cysteate, DMSP, *N*-acetylglucosamine, xylose, and malate. In a  
266 counterintuitive finding, the *N*-acetylglucosamine transporter mutant *nagTUVW* was the most enriched  
267 population in the pool, indicating a fitness gain for cells unable to take up the only provided substrate.  
268 We hypothesize that this was due to cross-feeding of an *N*-acetylglucosamine degradation product,  
269 released by the other mutants whose knockouts are in unrelated genes. While these results  
270 demonstrate that pooled-BarSeq mutant libraries are excellent tools for low-cost, high-throughput  
271 hypothesis generation, predicted transporter annotations nonetheless require experimental follow-up  
272 (28, 30).

### 273 *Transporter Expression in a Coastal Phytoplankton Bloom*

274 We used an *R. pomeroyi* gene expression dataset from a natural phytoplankton bloom in Fall 2016 in  
275 Monterey Bay, CA, USA (48) to assess the ecological relevance of the verified transporters. On 14 dates  
276 over 5 weeks during the decline of a bloom dominated by the dinoflagellate *Akashiwo sanguinea*, *R.*  
277 *pomeroyi* cells were introduced into the natural community for 90 min (9). Metatranscriptomic data  
278 from each sample were subsequently mapped to the *R. pomeroyi* genome to identify environmental  
279 conditions eliciting transcriptional responses. We reanalyzed this dataset in light of the new information

280 on transporter function, with the goal of generating insights into bloom-associated metabolites  
281 supporting heterotrophic bacterial growth.

282 To first evaluate the internal consistency of the expression data, pairwise correlation coefficients were  
283 calculated across the sample dates for the individual components of the 14 multi-component  
284 transporters. Nine systems had within-transporter correlation coefficients above 0.84 (Pearson  
285 correlation,  $p \leq 0.05$ ), confirming coherence in the expression patterns for genes in the same transporter  
286 system (Fig. 4a). The remaining four had within-transporter correlation coefficients ranging from 0.10 to  
287 0.60; three of these, however, had particularly low expression in Monterey Bay (Fig. 4b) that may have  
288 affected the accuracy of expression calculations.

289 Expression patterns of the carnitine, choline, taurine, and glycerol transporters were positively related  
290 to phytoplankton biomass through the bloom (Pearson correlation,  $p \leq 0.05$ ) (Fig. 4c), and we  
291 hypothesize that these compounds are consistent members of the exometabolite pool in dinoflagellate-  
292 dominated blooms. Expression of the C4 organic acid and polyamine transporters had peak expression  
293 coinciding with the largest drop in phytoplankton biomass (Fig. 4c), and we hypothesize that these  
294 compounds are released from senescing or dead phytoplankton. Transcripts from *R. pomeroyi*'s 126  
295 transporter systems were ranked by their abundance in the transcriptomes [mean transcripts per million  
296 (TPM), averaged across components for multi-gene transporters]. If heterotrophic bacterial transporter  
297 expression is regulated by substrate detection (admittedly an oversimplification (65)), citrate, 3-  
298 hydroxybutyrate, taurine, and DMSP, were among the most important sources of organic carbon to *R.*  
299 *pomeroyi* in this bloom (expression ranked in the top 25% of transporters). Conversely, DHPS and  
300 cysteate were among the least important (ranked in the bottom 25%) (Fig. 4b). 3-hydroxybutyrate was  
301 of particular interest for two reasons. First, transport systems for this substrate are poorly understood  
302 (66) with *hbtABC* representing the only confirmed identification of a bacterial transporter for this  
303 metabolite. Second, *hbtABC* was the third most-highly expressed *R. pomeroyi* transporter in Monterey

304 Bay, indicative of an unrecognized role as an important bacterial carbon source. The most highly  
305 expressed of all the *R. pomeroyi* transporters, however, was citrate, averaging almost 5-fold higher  
306 relative transcript abundance than the next highest (Fig. 4b).

### 307 *Homologous Transporters in the Roseobacter group*

308 *R. pomeroyi* and its relatives in the Roseobacter group are recognized for high abundance in many  
309 coastal marine environments (67, 68). The cultured members of this group typically have large, well-  
310 regulated genomes capable of diverse metabolisms (69) and are often associated with phytoplankton  
311 blooms (68, 70, 71). To determine the distribution of the 17 verified transporters in Roseobacter  
312 genomes, 13 other strains with closed genomes and representing a broad sampling of the group's  
313 phylogenetic diversity (49) were selected for analysis. Transporters for *N*-acetylglucosamine, C4 organic  
314 acids, polyamines, and carnitine are present only in close relatives of *R. pomeroyi*, consistent with  
315 vertical transmission (Fig. 5). Transporters for the organic sulfur compounds DHPS, taurine, and  
316 isethionate are common in deeply branching strains but retained in few of the more recently branching  
317 lineages. The transporters for cysteate and ectoine are unique or nearly so to *R. pomeroyi*, suggestive of  
318 specialized niche dimensions. Finally, transporters for thymidine, citrate, glycerol, and 3-  
319 hydroxybutyrate are well conserved throughout Roseobacter genomes (Fig. 5), indicating broad  
320 importance of these substrates to the ecology of this group. Patchy distribution of transporter orthologs  
321 relative to the group's phylogeny has been reported previously (72).

### 322 **Conclusions**

323 Thirteen *R. pomeroyi* transporter annotations were confirmed in a screen of 156 transporter gene  
324 mutants (disrupting 104 of the bacterium's 126 organic carbon influx transporter systems) against 63  
325 metabolites. The verified gene functions provided new insights into in a longitudinal dataset of *R.*  
326 *pomeroyi* transcription through a natural phytoplankton bloom, revealing details of the metabolite

327 landscape and generating the hypothesis that citrate, 3-hydroxybutyrate, taurine, and DMSP were highly  
328 available in the dinoflagellate-dominated Monterey Bay bloom. Comparative analysis of the verified  
329 transporters across *Roseobacter* genomes revealed, on the one hand, narrow niche dimensions  
330 restricted to subgroups (e.g., *R. pomeroyi* and its closest relatives), and on the other, broad ecological  
331 characteristics common across the group and reflecting its core ecological roles. As is the case for many  
332 marine bacterial taxa (73), the streamlined *Roseobacter* species that are more numerous in ocean  
333 microbial communities are poorly represented in culture collections (74). As such, experimental gene  
334 annotation is key for analyzing, or re-analyzing, microbial gene, transcript, and protein data harboring  
335 extensive untapped knowledge among their unannotated genes. For *R. pomeroyi*, this effort brings the  
336 percent of organic compound influx transporters with identified substrates to 13% of the 126 gene  
337 systems able to acquire metabolites from the ocean's carbon pools (Table S1).

### 338 **Acknowledgements**

339 The authors thank C. Smith, C. Sanlatte, and J. Schreier for advice and assistance. This work was  
340 supported by Simons Foundation grant 542391 to MAM within the Principles of Microbial Ecosystems  
341 Collaborative, and NSF award OCE-2019589 to MAM. This is the Center for Chemical Currencies of a  
342 Microbial Planet (C-CoMP) publication #00X.

### 343 **Competing Interests**

344 The authors declare no competing interests.

### 345 **Data Availability**

346 All growth and BarSeq data are available through BCO-DMO project [884792](#) . All raw NMR data,  
347 processing scripts, and processed files for the metabolite drawdown experiment are available in  
348 Metabolomics Workbench with Study ID ST002381 (DOI: <http://dx.doi.org/10.21228/M8ST4T>).

349 **Contributions**

350 WFS, MAM, and CRR conceived of and designed the research; WFS, HEK, CM, and LTR performed the  
351 experiments; MU performed NMR analysis; CM, LTR, and CRR generated and arrayed the mutant library;  
352 WFS and MAM conducted statistical analysis, generated figures, and wrote the manuscript with  
353 constructive input from all co-authors.



354 **References**

- 355 1. Azam F, Fenchel T, Field J, Grey J, Meyer-Reil L, Thingstad F. The ecological role of water-column  
356 microbes. *Mar Ecol Prog Ser.* 1983;10:257-63.
- 357 2. Anderson TR, Ducklow HW. Microbial loop carbon cycling in ocean environments studied using a  
358 simple steady-state model. *Aquat Microb Ecol.* 2001;26(1):37-49.
- 359 3. Moran MA, Ferrer-González FX, Fu H, Nowinski B, Olofsson M, Powers MA, et al. The ocean's labile  
360 DOC supply chain. *Limnol Oceanogr.* 2022.
- 361 4. Cole JJ, Likens GE, Strayer DL. Photosynthetically produced dissolved organic carbon: An important  
362 carbon source for planktonic bacteria. *Limnol Oceanogr.* 1982;27(6):1080-90.
- 363 5. Cavicchioli R, Ripple WJ, Timmis KN, Azam F, Bakken LR, Baylis M, et al. Scientists' warning to  
364 humanity: microorganisms and climate change. *Nat Rev Microbiol.* 2019;17(9):569-86.
- 365 6. Nayfach S, Roux S, Seshadri R, Udway D, Varghese N, Schulz F, et al. A genomic catalog of Earth's  
366 microbiomes. *Nat Biotechnol.* 2021;39(4):499-509.
- 367 7. Wang M, Carver JJ, Phelan VV, Sanchez LM, Garg N, Peng Y, et al. Sharing and community curation of  
368 mass spectrometry data with Global Natural Products Social Molecular Networking. *Nat Biotechnol.*  
369 2016;34(8):828.
- 370 8. Amin S, Hmelo L, Van Tol H, Durham B, Carlson L, Heal K, et al. Interaction and signalling between a  
371 cosmopolitan phytoplankton and associated bacteria. *Nature.* 2015;522(7554):98.
- 372 9. Nowinski B, Moran MA. Niche dimensions of a marine bacterium are identified using invasion  
373 studies in coastal seawater. *Nat Microbiol.* 2021;6(4):524-32.
- 374 10. Teeling H, Fuchs BM, Becher D, Klockow C, Gardebrecht A, Bennke CM, et al. Substrate-controlled  
375 succession of marine bacterioplankton populations induced by a phytoplankton bloom. *Science.*  
376 2012;336(6081):608-11.
- 377 11. Poretsky RS, Hewson I, Sun SL, Allen AE, Zehr JP, Moran MA. Comparative day/night  
378 metatranscriptomic analysis of microbial communities in the North Pacific subtropical gyre. *Environ*  
379 *Microbiol.* 2009;11(6):1358-75.
- 380 12. Sowell SM, Wilhelm LJ, Norbeck AD, Lipton MS, Nicora CD, Barofsky DF, et al. Transport functions  
381 dominate the SAR11 metaproteome at low-nutrient extremes in the Sargasso Sea. *ISME J.*  
382 2009;3(1):93-105.
- 383 13. Lidbury I, Murrell JC, Chen Y. Trimethylamine N-oxide metabolism by abundant marine  
384 heterotrophic bacteria. *P Natl Acad Sci USA.* 2014;111(7):2710-5.
- 385 14. Tang K, Jiao N, Liu K, Zhang Y, Li S. Distribution and functions of TonB-dependent transporters in  
386 marine bacteria and environments: implications for dissolved organic matter utilization. *PloS One.*  
387 2012;7(7):e41204.
- 388 15. Salazar G, Paoli L, Alberti A, Huerta-Cepas J, Ruscheweyh H-J, Cuenca M, et al. Gene expression  
389 changes and community turnover differentially shape the global ocean metatranscriptome. *Cell.*  
390 2019;179(5):1068-83. e21.
- 391 16. Ferrer-González FX, Widner B, Holderman NR, Glushka J, Edison AS, Kujawinski EB, et al. Resource  
392 partitioning of phytoplankton metabolites that support bacterial heterotrophy. *ISME J.* 2021;15:762-  
393 73.
- 394 17. Chang Y-C, Hu Z, Rachlin J, Anton BP, Kasif S, Roberts RJ, et al. COMBRES-DB: an experiment  
395 centered database of protein function: knowledge, predictions and knowledge gaps. *Nucleic Acids*  
396 *Res.* 2016;44(D1):D330-D5.
- 397 18. Erbilgin O, Rübél O, Louie KB, Trinh M, Raad Md, Wildish T, et al. MAGI: A method for metabolite  
398 annotation and gene integration. *ACS Chem Biol.* 2019;14(4):704-14.

- 399 19. Price MN, Deutschbauer AM, Arkin AP. Filling gaps in bacterial catabolic pathways with computation  
400 and high-throughput genetics. *PLoS Genet.* 2022;18(4).
- 401 20. Schnoes AM, Brown SD, Dodevski I, Babbitt PC. Annotation error in public databases: misannotation  
402 of molecular function in enzyme superfamilies. *PLoS Comput Biol.* 2009;5(12):e1000605.
- 403 21. Griffin JE, Gawronski JD, DeJesus MA, Ioerger TR, Akerley BJ, Sasseti CM. High-resolution  
404 phenotypic profiling defines genes essential for mycobacterial growth and cholesterol catabolism.  
405 *PLoS Pathog.* 2011;7(9):e1002251.
- 406 22. Van Opijnen T, Camilli A. A fine scale phenotype–genotype virulence map of a bacterial pathogen.  
407 *Genome Res.* 2012;22(12):2541-51.
- 408 23. Chao MC, Abel S, Davis BM, Waldor MK. The design and analysis of transposon insertion sequencing  
409 experiments. *Nat Rev Microbiol.* 2016;14(2):119-28.
- 410 24. Cameron DE, Urbach JM, Mekalanos JJ. A defined transposon mutant library and its use in  
411 identifying motility genes in *Vibrio cholerae*. *P Natl Acad Sci USA.* 2008;105(25):8736-41.
- 412 25. Price MN, Wetmore KM, Waters RJ, Callaghan M, Ray J, Liu H, et al. Mutant phenotypes for  
413 thousands of bacterial genes of unknown function. *Nature.* 2018;557(7706):503-9.
- 414 26. Wetmore KM, Price MN, Waters RJ, Lamson JS, He J, Hoover CA, et al. Rapid quantification of  
415 mutant fitness in diverse bacteria by sequencing randomly bar-coded transposons. *MBio.*  
416 2015;6(3):e00306-15.
- 417 27. Adler BA, Kazakov AE, Zhong C, Liu H, Kutter E, Lui LM, et al. The genetic basis of phage  
418 susceptibility, cross-resistance and host-range in *Salmonella*. *Microbiology.* 2021;167(12):001126.
- 419 28. Jensen HM, Eng T, Chubukov V, Herbert RA, Mukhopadhyay A. Improving membrane protein  
420 expression and function using genomic edits. *Sci Rep.* 2017;7(1):1-14.
- 421 29. Wehrs M, Thompson MG, Banerjee D, Prah J-P, Morella NM, Barcelos CA, et al. Investigation of Bar-  
422 seq as a method to study population dynamics of *Saccharomyces cerevisiae* deletion library during  
423 bioreactor cultivation. *Microb Cell Fact.* 2020;19(1):1-15.
- 424 30. Clark IC, Youngblut M, Jacobsen G, Wetmore KM, Deutschbauer A, Lucas L, et al. Genetic dissection  
425 of chlorate respiration in *Pseudomonas stutzeri* PDA reveals syntrophic (per) chlorate reduction.  
426 *Environ Microbiol.* 2016;18(10):3342-54.
- 427 31. Baba T, Ara T, Hasegawa M, Takai Y, Okumura Y, Baba M, et al. Construction of *Escherichia coli* K-12  
428 in-frame, single-gene knockout mutants: the Keio collection. *Mol Syst Biol.* 2006;2(1):2006.0008.
- 429 32. De Berardinis V, Vallenet D, Castelli V, Besnard M, Pinet A, Cruaud C, et al. A complete collection of  
430 single-gene deletion mutants of *Acinetobacter baylyi* ADP1. *Mol Syst Biol.* 2008;4(1):174.
- 431 33. Koo B-M, Kritikos G, Farelli JD, Todor H, Tong K, Kimsey H, et al. Construction and analysis of two  
432 genome-scale deletion libraries for *Bacillus subtilis*. *Cell Syst.* 2017;4(3):291-305. e7.
- 433 34. Kobayashi K, Ehrlich SD, Albertini A, Amati G, Andersen K, Arnaud M, et al. Essential *Bacillus subtilis*  
434 genes. *P Natl Acad Sci USA.* 2003;100(8):4678-83.
- 435 35. Porwollik S, Santiviago CA, Cheng P, Long F, Desai P, Fredlund J, et al. Defined single-gene and multi-  
436 gene deletion mutant collections in *Salmonella enterica* sv Typhimurium. *PloS One.*  
437 2014;9(7):e99820.
- 438 36. Liberati NT, Urbach JM, Miyata S, Lee DG, Drenkard E, Wu G, et al. An ordered, nonredundant library  
439 of *Pseudomonas aeruginosa* strain PA14 transposon insertion mutants. *P Natl Acad Sci USA.*  
440 2006;103(8):2833-8.
- 441 37. Ramage B, Erolin R, Held K, Gasper J, Weiss E, Brittnacher M, et al. Comprehensive arrayed  
442 transposon mutant library of *Klebsiella pneumoniae* outbreak strain KPNIH1. *J Bacteriol.*  
443 2017;199(20):e00352-17.
- 444 38. Mejia C, Trujillo Rodriguez L, Poudel R, Ellington A, Rivers A, Reisch C. An arrayed transposon library  
445 of *Ruegeria pomeroyi* DSS-3. *bioRxiv.* 2022:2022.09.11.507510.

- 446 39. Shiver AL, Culver R, Deutschbauer AM, Huang KC. Rapid ordering of barcoded transposon insertion  
447 libraries of anaerobic bacteria. *Nat Protoc.* 2021;16(6):3049-71.
- 448 40. Uchimiya M, Schroer W, Olofsson M, Edison AS, Moran MA. Diel investments in metabolite  
449 production and consumption in a model microbial system. *ISME J.* 2022:1-12.
- 450 41. Landa M, Burns AS, Roth SJ, Moran MA. Bacterial transcriptome remodeling during sequential co-  
451 culture with a marine dinoflagellate and diatom. *ISME J.* 2017;11:2677.
- 452 42. Lidbury I, Kimberley G, Scanlan DJ, Murrell JC, Chen Y. Comparative genomics and mutagenesis  
453 analyses of choline metabolism in the marine Roseobacter clade. *Environ Microbiol.*  
454 2015;17(12):5048-62.
- 455 43. Mayer J, Huhn T, Habeck M, Denger K, Hollemeyer K, Cook AM. 2, 3-Dihydroxypropane-1-sulfonate  
456 degraded by *Cupriavidus pinatubonensis* JMP134: purification of dihydroxypropanesulfonate 3-  
457 dehydrogenase. *Microbiology.* 2010;156(5):1556-64.
- 458 44. Schulz A, Stöveken N, Binzen IM, Hoffmann T, Heider J, Bremer E. Feeding on compatible solutes: A  
459 substrate-induced pathway for uptake and catabolism of ectoines and its genetic control by EnuR.  
460 *Environ Microbiol.* 2017;19(3):926-46.
- 461 45. Guillard R, Hargraves P. *Stichochrysis immobilis* is a diatom, not a chrysophyte. *Phycologia.*  
462 1993;32(3):234-6.
- 463 46. Maciejewski MW, Schuyler AD, Gryk MR, Moraru II, Romero PR, Ulrich EL, et al. NMRbox: a resource  
464 for biomolecular NMR computation. *Biophys J.* 2017;112(8):1529-34.
- 465 47. Delaglio F, Grzesiek S, Vuister GW, Zhu G, Pfeifer J, Bax A. NMRPipe: a multidimensional spectral  
466 processing system based on UNIX pipes. *J Biomol NMR.* 1995;6(3):277-93.
- 467 48. Nowinski B, Smith CB, Thomas CM, Esson K, Marin R, Preston CM, et al. Microbial metagenomes and  
468 metatranscriptomes during a coastal phytoplankton bloom. *Sci Data.* 2019;6(1):1-7.
- 469 49. Simon M, Scheuner C, Meier-Kolthoff JP, Brinkhoff T, Wagner-Döbler I, Ulbrich M, et al.  
470 Phylogenomics of *Rhodobacteraceae* reveals evolutionary adaptation to marine and non-marine  
471 habitats. *ISME J.* 2017;11(6):1483-99.
- 472 50. Lee MD. GToTree: a user-friendly workflow for phylogenomics. *Bioinformatics.* 2019;35(20):4162-4.
- 473 51. Buchfink B, Reuter K, Drost H-G. Sensitive protein alignments at tree-of-life scale using DIAMOND.  
474 *Nat Methods.* 2021;18(4):366-8.
- 475 52. Rivers AR, Burns AS, Chan L-K, Moran MA. Experimental identification of small non-coding RNAs in  
476 the model marine bacterium *Ruegeria pomeroyi* DSS-3. *Front Microbiol.* 2016;7:380.
- 477 53. Moran MA, Buchan A, González JM, Heidelberg JF, Whitman WB, Kiene RP, et al. Genome sequence  
478 of *Silicibacter pomeroyi* reveals adaptations to the marine environment. *Nature.* 2004;432:910.
- 479 54. Moran MA, Kujawinski EB, Schroer WF, Amin SA, Bates NR, Bertrand EM, et al. Microbial  
480 metabolites in the marine carbon cycle. *Nat Microbiol.* 2022;7(4):508-23.
- 481 55. Wiegmann K, Hensler M, Wöhlbrand L, Ulbrich M, Schomburg D, Rabus R. Carbohydrate catabolism  
482 in *Phaeobacter inhibens* DSM 17395, a member of the marine Roseobacter clade. *Appl Environ*  
483 *Microbiol.* 2014;80(15):4725-37.
- 484 56. Weinitschke S, Sharma PI, Stingl U, Cook AM, Smits TH. Gene clusters involved in isethionate  
485 degradation by terrestrial and marine bacteria. *Appl Environ Microbiol.* 2010;76(2):618-21.
- 486 57. Mou X, Sun S, Rayapati P, Moran MA. Genes for transport and metabolism of spermidine in *Ruegeria*  
487 *pomeroyi* DSS-3 and other marine bacteria. *Aquat Microb Ecol.* 2010;58(3):311-21.
- 488 58. Gorzynska AK, Denger K, Cook AM, Smits TH. Inducible transcription of genes involved in taurine  
489 uptake and dissimilation by *Silicibacter pomeroyi* DSS-3. *Arch Microbiol.* 2006;185(5):402-6.
- 490 59. Sun L, Curson AR, Todd JD, Johnston AW. Diversity of DMSP transport in marine bacteria, revealed  
491 by genetic analyses. *Biogeochemistry.* 2012;110(1):121-30.

- 492 60. Durham BP, Boysen AK, Carlson LT, Groussman RD, Heal KR, Cain KR, et al. Sulfonate-based  
493 networks between eukaryotic phytoplankton and heterotrophic bacteria in the surface ocean. *Nat*  
494 *Microbiol.* 2019;4(10):1706-15.
- 495 61. Shibl AA, Isaac A, Ochsenkühn MA, Cárdenas A, Fei C, Behringer G, et al. Diatom modulation of  
496 select bacteria through use of two unique secondary metabolites. *P Natl Acad Sci USA.*  
497 2020;117(44):27445-55.
- 498 62. Weber L, Armenteros M, Soule MK, Longnecker K, Kujawinski EB, Apprill A. Extracellular reef  
499 metabolites across the protected Jardines de la Reina, Cuba reef system. *Front Mar Sci.* 2020.
- 500 63. Chen C, Beattie GA. *Pseudomonas syringae* BetT is a low-affinity choline transporter that is  
501 responsible for superior osmoprotection by choline over glycine betaine. *J Bacteriol.* 2008.
- 502 64. Curson AR, Todd JD, Sullivan MJ, Johnston AW. Catabolism of dimethylsulphoniopropionate:  
503 microorganisms, enzymes and genes. *Nat Rev Microbiol.* 2011;9(12):849-59.
- 504 65. Moran MA, Satinsky B, Gifford SM, Luo H, Rivers A, Chan L-K, et al. Sizing up metatranscriptomics.  
505 *ISME J.* 2013;7(2):237-43.
- 506 66. Mierziak J, Burgberger M, Wojtasik W. 3-hydroxybutyrate as a metabolite and a signal molecule  
507 regulating processes of living organisms. *Biomolecules.* 2021;11(3):402.
- 508 67. González JM, Moran MA. Numerical dominance of a group of marine bacteria in the alpha-subclass  
509 of the class Proteobacteria in coastal seawater. *Appl Environ Microbiol.* 1997;63(11):4237-42.
- 510 68. Giebel H-A, Kalhoefer D, Lemke A, Thole S, Gahl-Janssen R, Simon M, et al. Distribution of  
511 *Roseobacter* RCA and SAR11 lineages in the North Sea and characteristics of an abundant RCA  
512 isolate. *ISME J.* 2011;5(1):8-19.
- 513 69. Luo H, Moran MA. Evolutionary ecology of the marine *Roseobacter* clade. *Microbiol Mol Biol Rev.*  
514 2014;78(4):573-87.
- 515 70. González JM, Simó R, Massana R, Covert JS, Casamayor EO, Pedrós-Alió C, et al. Bacterial community  
516 structure associated with a dimethylsulfonylpropionate-producing North Atlantic algal bloom. *Appl*  
517 *Environ Microbiol.* 2000;66(10):4237-46.
- 518 71. Buchan A, LeClerc GR, Gulvik CA, González JM. Master recyclers: features and functions of bacteria  
519 associated with phytoplankton blooms. *Nat Rev Microbiol.* 2014;12(10):686-98.
- 520 72. Newton RJ, Griffin LE, Bowles KM, Meile C, Gifford S, Givens CE, et al. Genome characteristics of a  
521 generalist marine bacterial lineage. *ISME J.* 2010;4(6):784-98.
- 522 73. Stewart EJ. Growing unculturable bacteria. *J Bacteriol.* 2012;194(16):4151-60.
- 523 74. Buchan A, González JM, Moran MA. Overview of the marine *Roseobacter* lineage. *Appl Environ*  
524 *Microbiol.* 2005;71(10):5665-77.

525

526

527

528

529

530

531

## 532 **Figure Legends**

533 Fig. 1. Experimental flow chart for the *R. pomeroyi* BarSeq library. Right path: Pooled mutant  
534 populations (pooled-BarSeq library) are used for gene fitness assays. Left path: Individual transporter  
535 mutants from the library (arrayed-BarSeq library) are used to screen for growth and metabolite  
536 drawdown.

537 Fig. 2. Growth and substrate draw-down results for the four novel transporter annotations. a) Growth of  
538 transporter mutants compared to growth of the pooled-BarSeq library (an analog for wild-type growth  
539 but carrying transposon and resistance gene insertions) on selected marine plankton metabolites.  
540 Shaded regions indicate 95% confidence intervals (n=4). Numbers refer to *Ruegeria pomeroyi* DSS-3  
541 locus tags (Table 1). B) Substrate concentrations (<sup>1</sup>H-NMR peak area) after growth of mutants (brown  
542 symbols, n=3) or the pooled-BarSeq library (green symbols, n=3), and at inoculation (gray symbols, n=2).  
543 Letters that differ indicate that peak area for the isolated mutant(s) was significantly different than for  
544 the pooled-BarSeq library (ANOVA, n=3,  $p \leq 0.05$ ), with a TukeyHSD test carried out when multiple  
545 mutants for the same substrate were tested ( $p \leq 0.05$ ). For full results, see Table 1.

546 Fig. 3. Relative abundance of *Ruegeria pomeroyi* DSS-3 transporter mutants following selection of the  
547 pooled-BarSeq library for growth on 10 metabolites. Green symbols indicate significant mutant  
548 depletion (T-test, n=4, Benjamini-Hochberg adjusted  $p \leq 0.05$ ) and gray symbols indicate non-significant  
549 changes. The larger filled symbols indicate the identified transporter for that metabolite as determined  
550 from growth and draw-down assays of individual mutants, and is colored green if it was correctly  
551 identified, and colored gray if not. Mutant enrichment/depletion for multi-gene transporter systems is  
552 plotted as the average of all components.

553 Fig. 4. a) Mean correlation coefficients of relative expression levels of genes in multi-component  
554 transporter systems in Monterey Bay, in Fall, 2016. b) Mean relative expression levels for the 126 *R.*  
555 *pomeroyi* transporter systems when introduced into Monterey Bay seawater, averaged across 14 dates.  
556 c) Relative expression of selected *R. pomeroyi* DSS-3 transporters in Monterey Bay seawater on each of  
557 14 dates over 35 days, normalized as Z-scores. Transporters have 1-5 component genes (each colored in  
558 different shades of brown) and each component gene has three replicates plotted individually. Lines  
559 connect the component mean expression through time. Total phytoplankton biomass ( $\mu\text{g C L}^{-1}$ ) during  
560 the 5-week sampling period is also shown.

561 Fig. 5. Orthologs of the verified *R. pomeroyi* DSS-3 transporter systems in Roseobacter group members.  
562 Each row indicates a single gene and shading indicates genes that make up multi-component  
563 transporters. The circles denote orthologs identified by BLASTp using  $e \leq 10^{-5}$  and identity  $\geq 70\%$   
564 thresholds. The triangles denote orthologs of multicomponent that did not meet the BLAST thresholds  
565 but were co-located in a transporter operon with components that did. Strain phylogeny is based on  
566 analysis of 117 single copy genes.

567

568 Table 1. Transporter identification based on growth and metabolite drawdown screens.  $\Delta$ OD, percent  
 569 decrease in optical density of the isolated mutant relative to pooled-BarSeq library with associated 95%  
 570 confidence interval and p value (n=4, ANOVA with TukeyHSD).  $\Delta$ Drawdown, percent decrease in  
 571 drawdown by the isolated mutant relative to the pooled-BarSeq library with associated 95% confidence  
 572 interval and p value (n=3, ANOVA with TukeyHSD). Prediction, previous annotation status of the  
 573 transporter as follows: novel = annotation was not known or hypothesized; homology = annotation was  
 574 hypothesized based on sequence similarity; expression = annotation was hypothesized based on gene  
 575 expression data; control = annotation known based on previous *R. pomeroiyi* knockout mutant. GlcNAc,  
 576 N-acetylglucosamine, N.S., not significant ( $p \geq 0.05$ ).

| Transporter     | Mutant           | Substrate     | Prediction | $\Delta$ OD (%) | 95% CI (% +/-) | p adj                 | $\Delta$ Drawdown (%) | 95% CI (% +/-) | p adj                 |
|-----------------|------------------|---------------|------------|-----------------|----------------|-----------------------|-----------------------|----------------|-----------------------|
| <i>tctABC</i>   | $\Delta$ SPO0184 | Citrate       | homology   | 99.1            | 12.4           | $1.1 \times 10^{-6}$  | 99.3                  | 3.6            | $5.4 \times 10^{-12}$ |
| <i>nupABC</i>   | $\Delta$ SPO0378 | Thymidine     | novel      | 81.1            | 23.5           | $1.3 \times 10^{-5}$  | 63.6                  | 32.5           | $2.3 \times 10^{-3}$  |
|                 | $\Delta$ SPO0379 | Thymidine     | novel      | 81.5            | 23.5           | $1.3 \times 10^{-5}$  | 83.0                  | 32.5           | $5.6 \times 10^{-4}$  |
| <i>hpsKLM</i>   | $\Delta$ SPO0591 | DHPS          | control    | 78.6            | 30.7           | $7.7 \times 10^{-4}$  | 64.8                  | 19.0           | $1.1 \times 10^{-4}$  |
| <i>glpVSTPQ</i> | $\Delta$ SPO0608 | Glycerol      | homology   | 79.6            | 13.0           | $5.3 \times 10^{-6}$  | 78.8                  | 2.8            | $2.1 \times 10^{-12}$ |
| <i>tauABC</i>   | $\Delta$ SPO0674 | Taurine       | expression | 91.8            | 20.6           | $1.5 \times 10^{-6}$  | -3.1                  | 34.2           | N.S.                  |
|                 | $\Delta$ SPO0676 | Taurine       | expression | 92.8            | 20.6           | $1.4 \times 10^{-6}$  | 49.1                  | 34.2           | $1.1 \times 10^{-2}$  |
| <i>xyIFGH</i>   | $\Delta$ SPO0863 | Glucose       | expression | 92.1            | 9.7            | $4.9 \times 10^{-7}$  | 85.6                  | 30.9           | $1.5 \times 10^{-3}$  |
|                 | $\Delta$ SPO0863 | Xylose        | expression | 96.6            | 5.6            | $1.1 \times 10^{-8}$  | 52.8                  | 45.5           | $3.2 \times 10^{-2}$  |
| <i>betT</i>     | $\Delta$ SPO1087 | Choline       | control    | 100.5           | 8.9            | $2.3 \times 10^{-7}$  | 94.1                  | 10.8           | $2.2 \times 10^{-5}$  |
| <i>uehABC</i>   | $\Delta$ SPO1147 | Ectoine       | control    | 86.7            | 6.1            | $5.5 \times 10^{-8}$  | 62.1                  | 3.8            | $9.2 \times 10^{-3}$  |
| <i>nagTUVW</i>  | $\Delta$ SPO1839 | GlcNAc        | homology   | 78.4            | 7.1            | $2.6 \times 10^{-7}$  | 92.7                  | 5.0            | $5.7 \times 10^{-8}$  |
| <i>iseKLM</i>   | $\Delta$ SPO2357 | Isethionate   | expression | 101.1           | 10.2           | $1.8 \times 10^{-9}$  | 96.0                  | 41.9           | $1.0 \times 10^{-3}$  |
|                 | $\Delta$ SPO2358 | Isethionate   | expression | 104.2           | 10.2           | $1.6 \times 10^{-9}$  | 69.8                  | 41.9           | $5.3 \times 10^{-3}$  |
| <i>hbtABC</i>   | $\Delta$ SPO2573 | 3-OH butyrate | novel      | 92.7            | 3.9            | $5.4 \times 10^{-10}$ | 79.8                  | 11.7           | $5.3 \times 10^{-5}$  |
| <i>dctMPQ</i>   | $\Delta$ SPO2626 | Fumarate      | homology   | 99.1            | 3.3            | $2.7 \times 10^{-14}$ | 98.0                  | 7.9            | $1.6 \times 10^{-9}$  |
|                 | $\Delta$ SPO2626 | Malate        | homology   | 48.6            | 25.3           | $4.9 \times 10^{-4}$  | 58.1                  | 13.6           | $3.8 \times 10^{-6}$  |
|                 | $\Delta$ SPO2626 | Succinate     | homology   | 92.6            | 11.0           | $3.6 \times 10^{-11}$ | 64.9                  | 5.3            | $1.9 \times 10^{-9}$  |
|                 | $\Delta$ SPO2628 | Fumarate      | homology   | 96.7            | 3.3            | $2.7 \times 10^{-14}$ | 95.0                  | 7.9            | $2.1 \times 10^{-9}$  |
|                 | $\Delta$ SPO2628 | Malate        | homology   | 11.2            | 25.3           | N.S.                  | 47.7                  | 13.6           | $1.7 \times 10^{-5}$  |
|                 | $\Delta$ SPO2628 | Succinate     | homology   | 75.2            | 11.0           | $6.9 \times 10^{-10}$ | 50.8                  | 5.3            | $9.6 \times 10^{-9}$  |
|                 | $\Delta$ SPO2630 | Fumarate      | homology   | 96.9            | 3.3            | $2.7 \times 10^{-14}$ | 94.9                  | 7.9            | $2.1 \times 10^{-9}$  |
|                 | $\Delta$ SPO2630 | Malate        | homology   | 12.7            | 25.3           | N.S.                  | 62.7                  | 13.6           | $2.1 \times 10^{-6}$  |
| <i>cntTUVWX</i> | $\Delta$ SPO2630 | Succinate     | homology   | 81.8            | 11.0           | $2.3 \times 10^{-10}$ | 58.0                  | 5.3            | $4.4 \times 10^{-9}$  |
|                 | $\Delta$ SPO2995 | Carnitine     | novel      | 48.1            | 25.8           | $1.4 \times 10^{-3}$  | 69.2                  | 36.7           | $2.8 \times 10^{-3}$  |
| <i>cuyTUVW</i>  | $\Delta$ SPO2996 | Carnitine     | novel      | 61.1            | 25.8           | $2.5 \times 10^{-4}$  | 85.7                  | 36.7           | $9.1 \times 10^{-4}$  |
|                 | $\Delta$ SPO3040 | Cysteate      | novel      | 50.3            | 15.3           | $1.9 \times 10^{-5}$  | 38.9                  | 30.7           | $1.9 \times 10^{-2}$  |
| <i>dmdT</i>     | $\Delta$ SPO3041 | Cysteate      | novel      | 81.3            | 15.3           | $3.4 \times 10^{-9}$  | 40.0                  | 30.7           | $1.7 \times 10^{-2}$  |
|                 | $\Delta$ SPO3186 | DMSF          | homology   | 48.9            | 13.4           | $1.1 \times 10^{-4}$  | 33.6                  | 2.4            | $1.6 \times 10^{-6}$  |
| <i>potFGHI</i>  | $\Delta$ SPO3469 | Cadaverine    | expression | 62.3            | 7.4            | $8.3 \times 10^{-7}$  | 61.2                  | 23.5           | $1.9 \times 10^{-3}$  |
|                 | $\Delta$ SPO3469 | Putrescine    | expression | 68.8            | 10.3           | $3.2 \times 10^{-6}$  | 65.1                  | 12.8           | $1.5 \times 10^{-4}$  |
|                 | $\Delta$ SPO3469 | Spermidine    | expression | 63.6            | 16.8           | $8.9 \times 10^{-5}$  | 75.2                  | 5.8            | $2.4 \times 10^{-6}$  |

577

*Mejia et al.*  
2022

*Wetmore et al.*  
2015

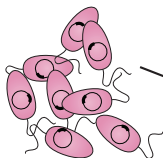

Arrayed BarSeq  
Library

Pooled BarSeq  
Library

**mutant phenotype**

**mutant fitness**

**Growth Screen**  
(low & high resolution)

**Fitness Assay**

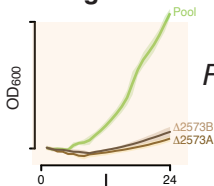

Figure 3

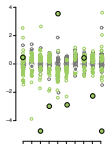

**Drawdown Screen**

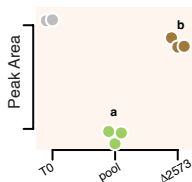



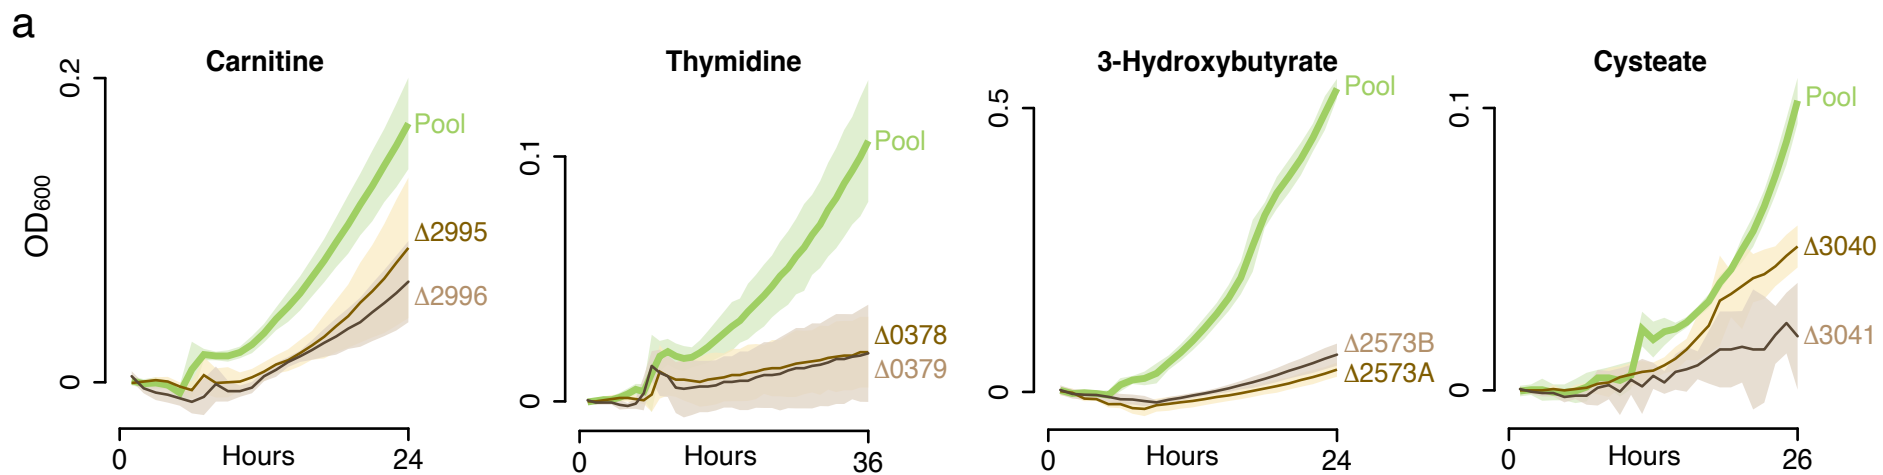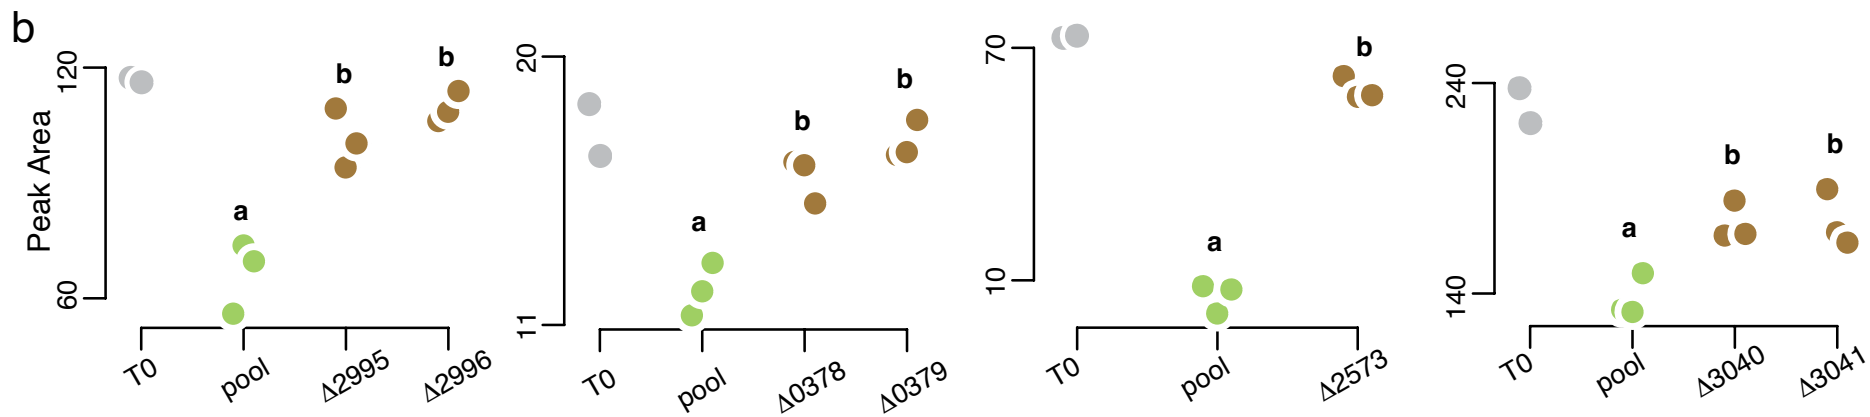

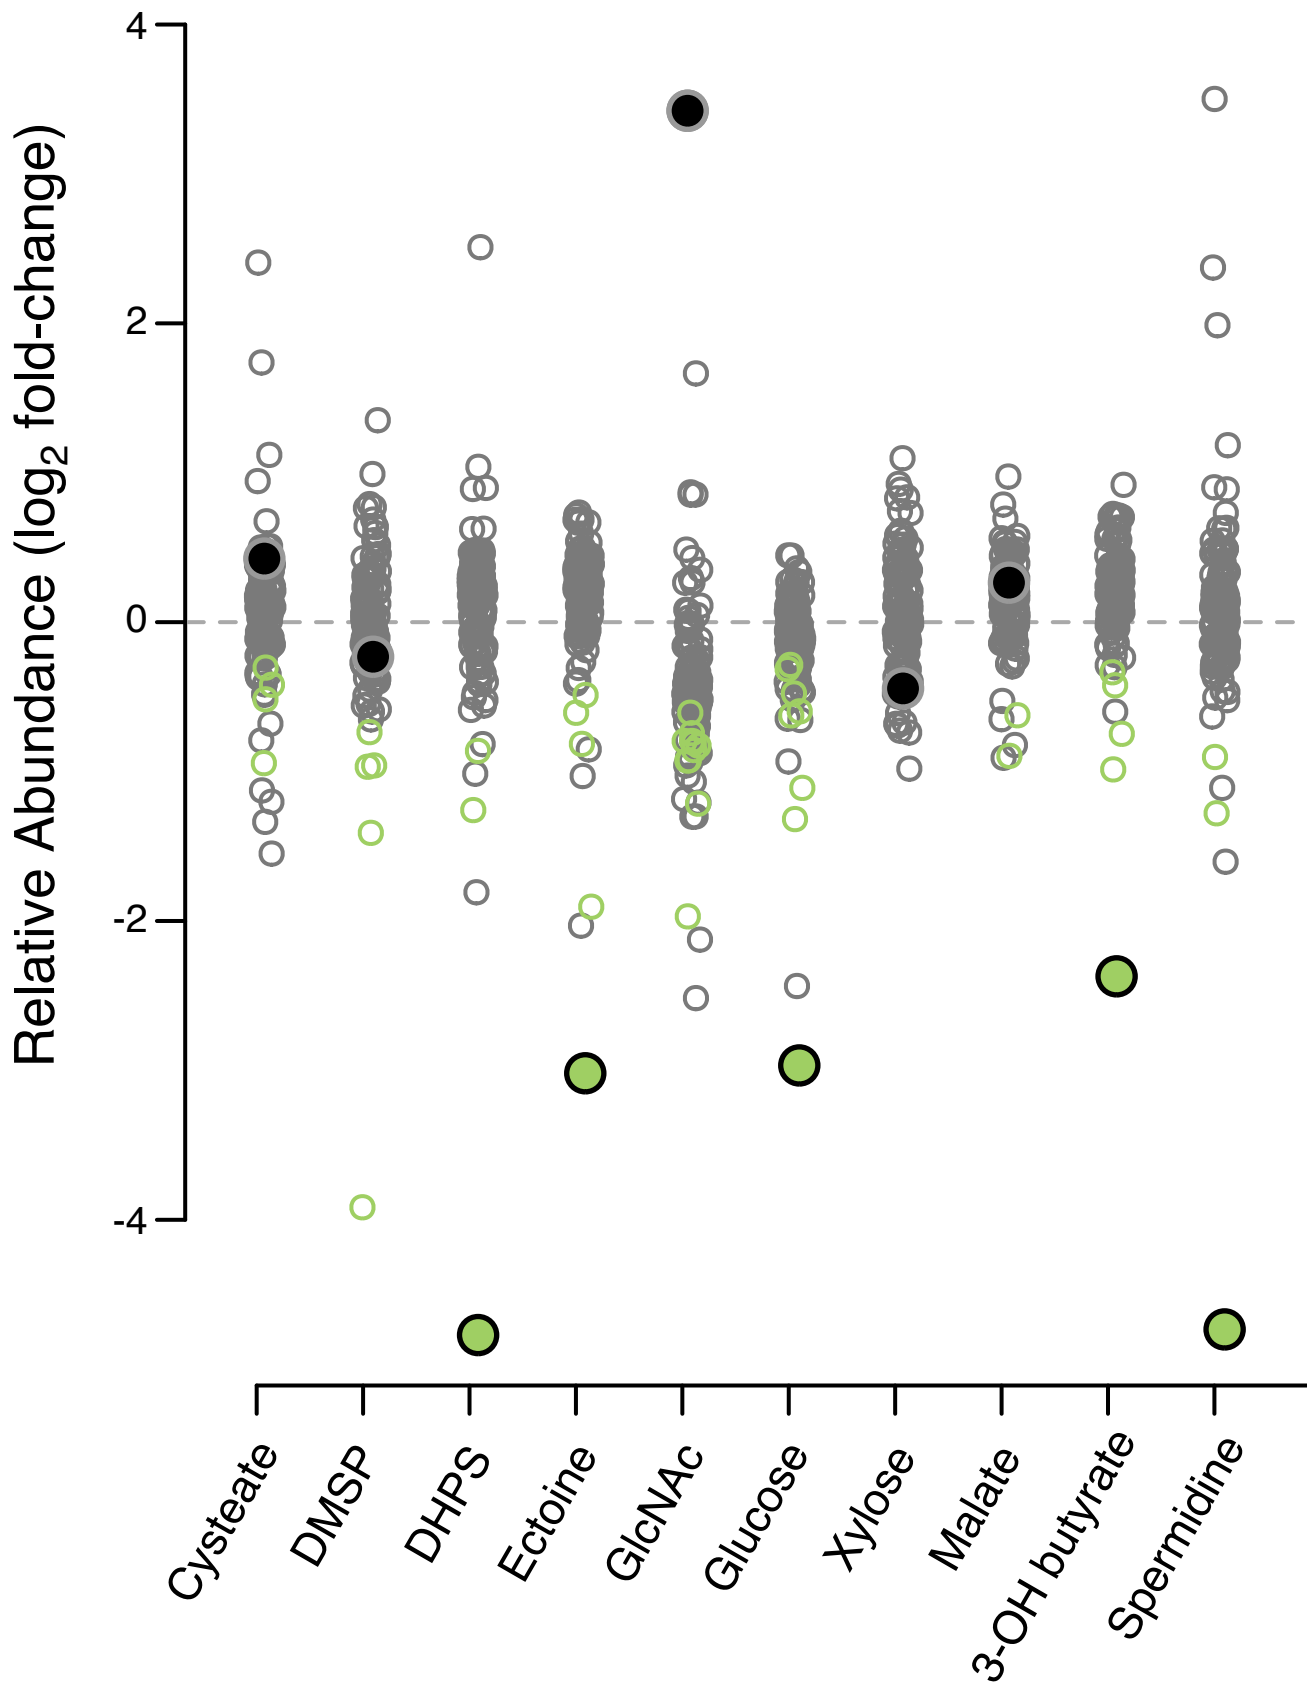

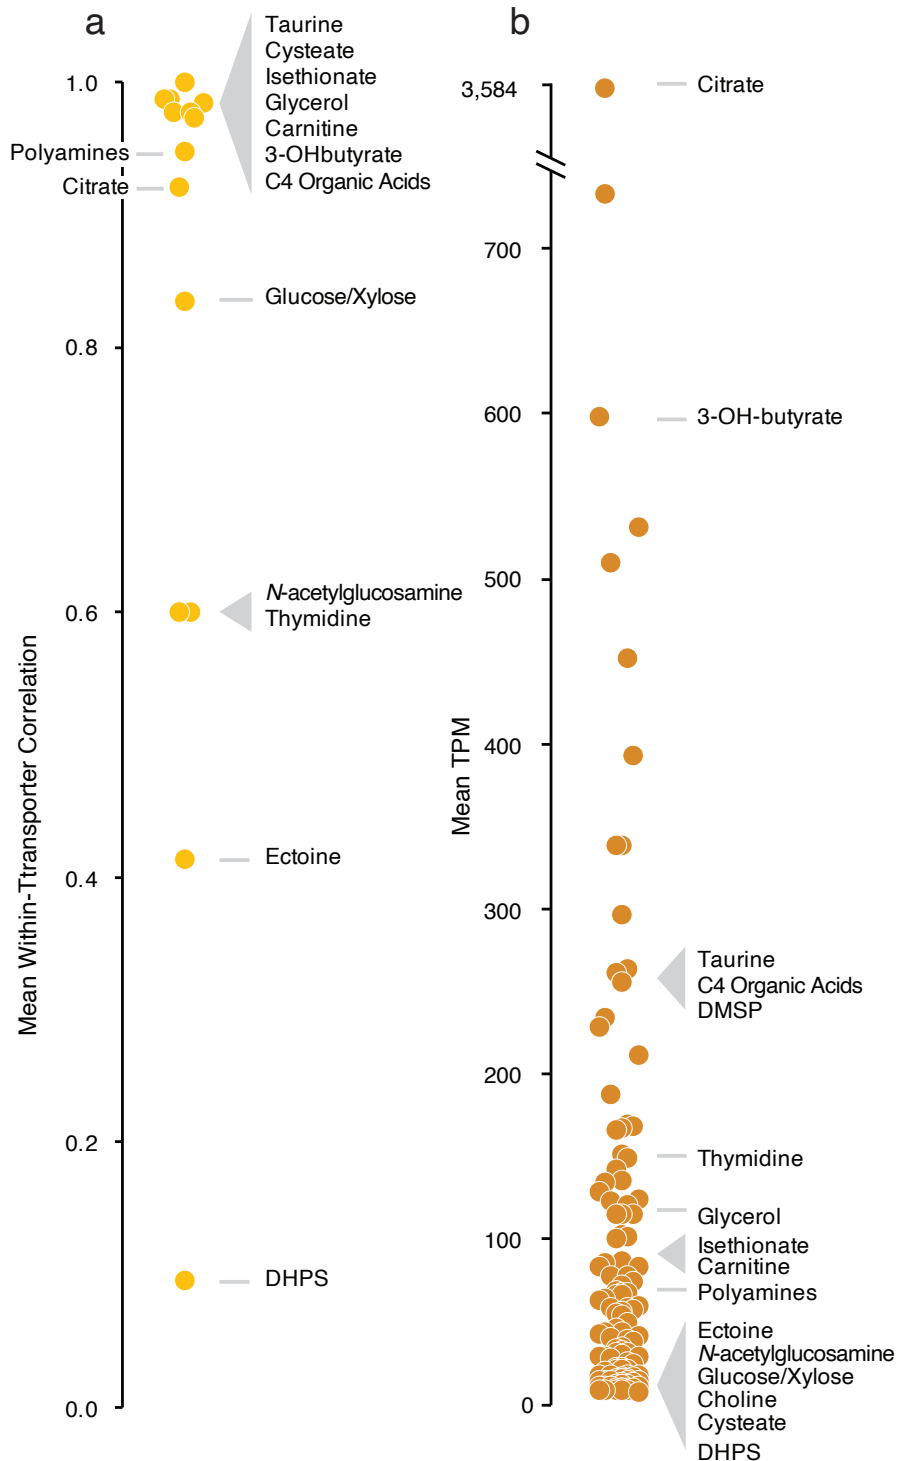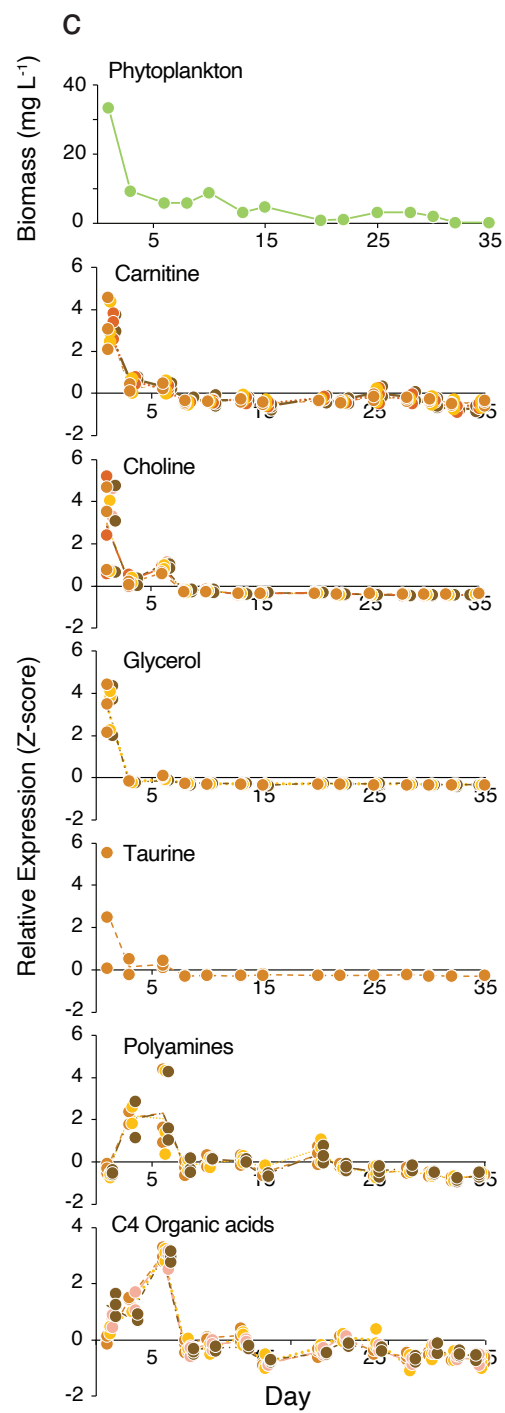

Source: https://www.biorxiv.org/content/10.1101/2023.01.19.524783v1.full.pdf
